# Supplementary material
Source: Springer Nature journal article supplement (https://www.springermedizin.de/resource/supplementary/12936_2011_1857_MOESM16_ESM.pdf/9541930)

**A**

## cir subfamily 1

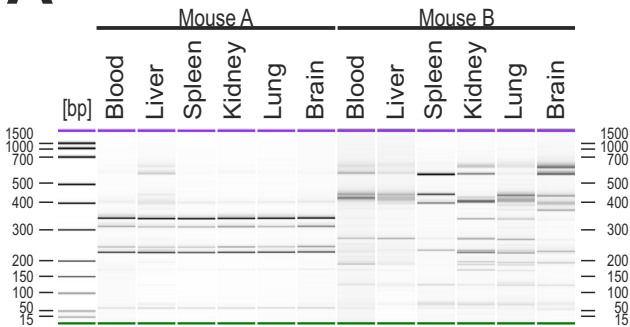**B**

## cir subfamily 2

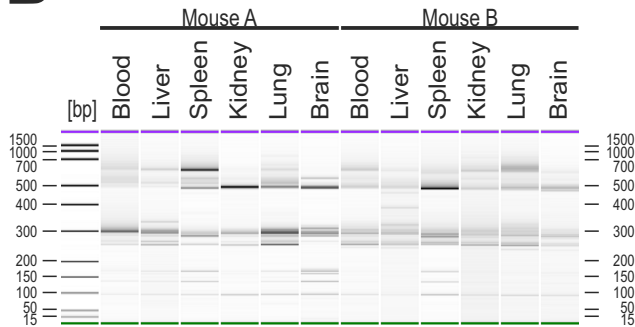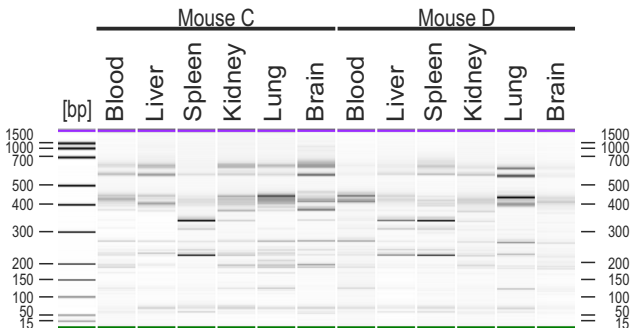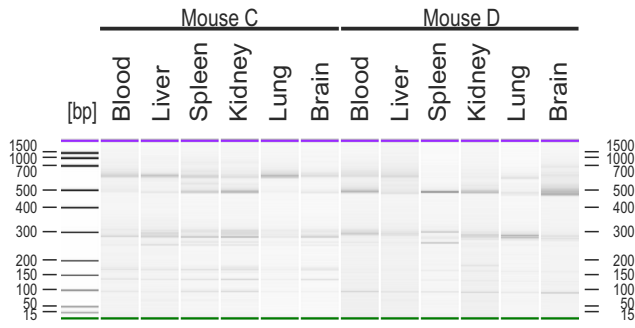

Supplement: MOESM16 [file 9541930]
